# Supplementary material for: Investigations on the mechanism, kinetics and isotherms of ammonium and humic acid co-adsorption at low temperature by 4A-molecular sieves modified from attapulgite
Source: Royal Society of Chemistry journal article supplement (doi:10.1039/c7ra00268h), 2017-01-01
Supplement: c7ra00268h1.pdf [file c7ra00268h1.pdf]

## Supporting information

**Investigations on the mechanism, kinetic and isotherm of ammonium and humic acid co-adsorption at low temperature by 4A-molecular sieve modified from attapulgite**

Nan Sun<sup>a, \*</sup>, Wenxin Shi<sup>b</sup>, Lixin Ma<sup>c</sup>, Shuili Yu<sup>b, d, \*</sup>

<sup>a</sup> *School of Water Conservancy and Civil Engineering, Northeast Agricultural University, Harbin 150030, China*

<sup>b</sup> *State Key Laboratory of Urban Water Resource and Environment, Harbin Institute of Technology, Harbin 150090, China*

<sup>c</sup> *Department of Environmental Protection of Heilongjiang Province, Harbin 150090, China*

<sup>d</sup> *State Key Laboratory of Pollution Control and Resources Reuse, Tongji University, Shanghai 200092, China*

\* Corresponding author. Tel.: +86 21 65982708; fax: +86 21 65982708.

E-mail addresses: [nan662001@163.com](mailto:nan662001@163.com) (Nan Sun), [yu\\_shuili@163.com](mailto:yu_shuili@163.com) (Shuili Yu)

### 1. Determination of $\text{pH}_{\text{zpc}}$ of 4A-molecular sieve

The  $\text{pH}_{\text{zpc}}$  of 4A-molecular sieve was determined by pH drift procedure, and the data was shown in Fig. S1. It can be seen from the Fig. S1, the  $\text{pH}_{\text{zpc}}$  of 4A-molecular sieve was around 4.11.

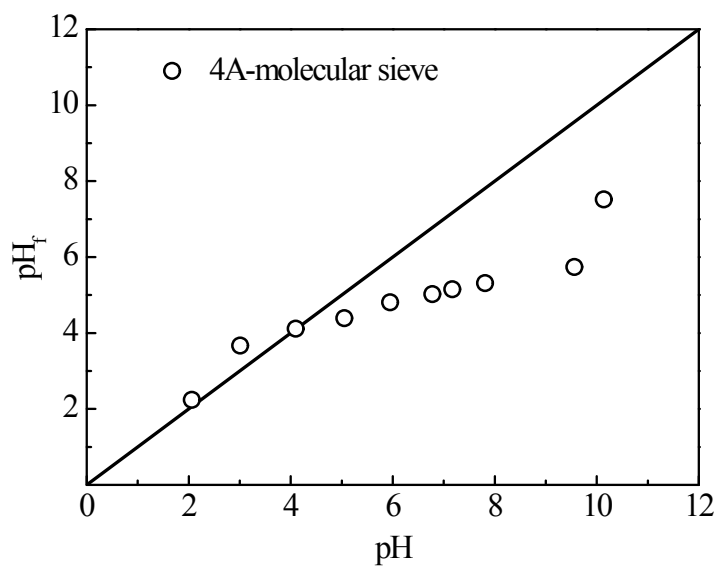

Fig. S1 Surface charge analysis of 4A-molecular sieve
